# Supplementary material for: Electromagnetic Field Enhancement of Nanostructured TiN Electrodes Probed with Surface-Enhanced Raman Spectroscopy
Source: MDPI journal article supplement (doi:10.3390/s22020487), 2022-01-09
Supplement: s1 [file s1]

## Supporting Information

# Electromagnetic Field Enhancement of Nanostructured TiN Electrodes Probed with Surface-Enhanced Raman Spectroscopy

Ibrahim Halil Öner <sup>1,†</sup>, Christin David <sup>2,†</sup>, Christine Joy Querebillo <sup>1</sup>, Inez M. Weidinger <sup>1,\*</sup> and Khoa Hoang Ly <sup>1,\*</sup>

<sup>1</sup> Fakultät für Chemie und Lebensmittelchemie, Technische Universität Dresden, Andreas-Schubert-Bau, Zellescher Weg 19, 01069 Dresden, Germany; ibrahim.halil.oener@me.com (I.H.Ö.); christine\_joy.querebillo@tu-dresden.de (C.J.Q.)

<sup>2</sup> Abbe Center of Photonics, Institute of Condensed Matter Theory and Optics, Friedrich-Schiller-Universität Jena, Max-Wien-Platz 1, 07743 Jena, Germany; christin.david@uni-jena.de

\* Correspondence: inez.weidinger@tu-dresden.de (I.M.W.); hoang\_khoa.ly@tu-dresden.de (K.H.L.)

† These authors contributed equally.

## Table of content

| Number    | Section                                                                                                                                                                                                                                    | Page |
|-----------|--------------------------------------------------------------------------------------------------------------------------------------------------------------------------------------------------------------------------------------------|------|
| <b>1</b>  | <b>TiN synthesis &amp; characterisation</b>                                                                                                                                                                                                |      |
| Figure S1 | (A) Photo of the smooth and nanostructured TiN electrodes. (B) Raman spectrum of the rough TiN electrode.                                                                                                                                  | 3    |
| Figure S2 | SEM image of the nanotubular TiO <sub>2</sub> electrode (A) used as template for nitridation and subsequently obtained TiN electrode (B).                                                                                                  | 3    |
| <b>2</b>  | <b>Raman &amp; surface enhance Raman spectroscopy of azidobenzene</b>                                                                                                                                                                      |      |
| Figure S3 | Cyclic voltammograms of the TiN electrode before (trace a) and after (trace b) AB physisorption. Trace c is obtained after washing of the electrode with water.                                                                            | 4    |
| Figure S4 | Raman spectra of AB in tert-butylmethylether as a function of concentration. (B) n7 and n11 intensity as a function of AB concentration.                                                                                                   | 4    |
| Figure S5 | Approximated laser profiles for Raman/SERS solution (A) and surface (B) measurements.                                                                                                                                                      | 5    |
| <b>3</b>  | <b>RCWA electromagnetic field calculations</b>                                                                                                                                                                                             |      |
| Figure S6 | Top view showing the distribution of localized field hot spots upon illumination at 413 nm for 6 different nanotube lengths $d$ . Scale shows the field enhancement (EF) value to forth order $ E ^4/ E_0 ^4$ .                            | 6    |
| Figure S7 | Side view of 3 units cells combined at illumination with 413 nm. The scale shows the field enhancement factor (EF) value to forth order $ E ^4/ E_0 ^4$ .                                                                                  | 7    |
| Figure S8 | (A) Calculated relative absorbance $A = 1 - R - T$ (A) and EME $ \vec{E} ^4/ \vec{E}_0 ^4$ values (B) at fixed tube lengths $d$ ranging from 160 to 300 nm. Dashed orange lines represent the average over the different nanotube lengths. | 8    |
| Figure S9 | Spectral position of the plasmonic resonance of the flat TiN surface (black curve, SPP) compared to the nanostructured TiN electrode ( $d = 250$ nm) exhibiting, in addition, a lattice resonance above 600 nm (green curve).              | 8    |

## 1. TiN Synthesis & Characterisation

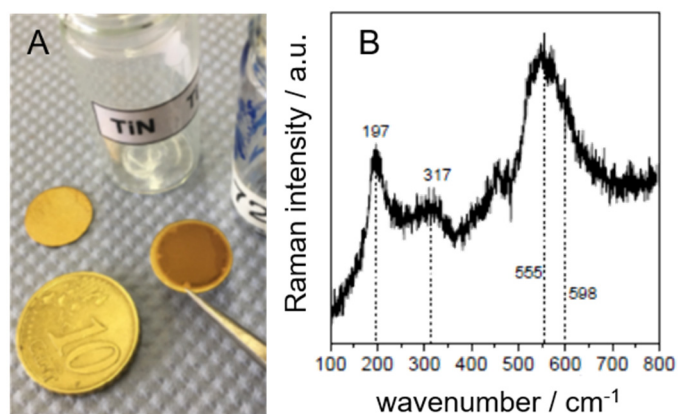

**Figure S1.** (A) Image showing the smooth (left) and nanostructured TiN electrode (right), respectively. (B) 514 nm Raman spectrum of the rough TiN electrode.

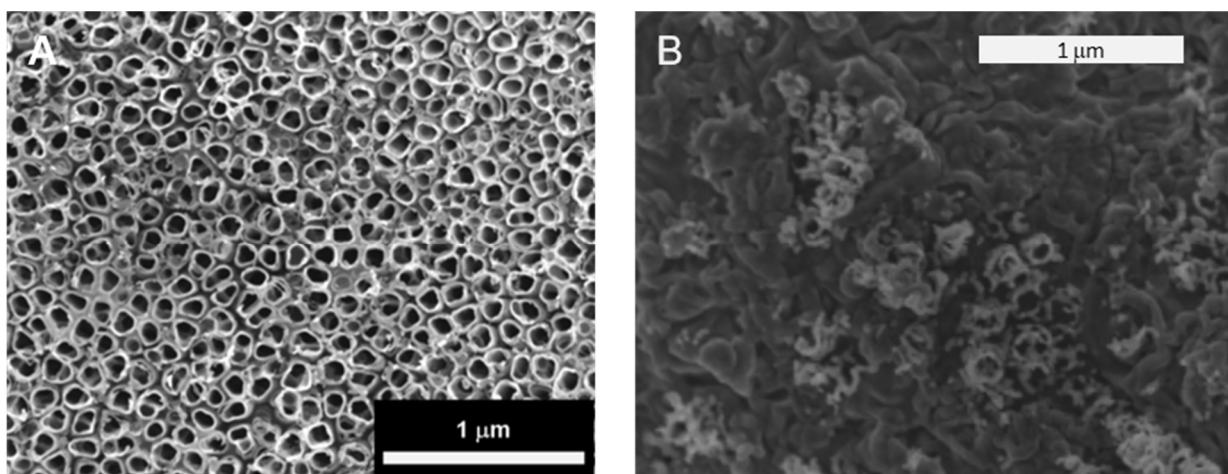

**Figure S2.** (A) SEM image of the nanotubular  $\text{TiO}_2$  electrode used as template for nitridation. (B) SEM image of the subsequently obtained TiN electrode (B).

## 2. Raman & Surface-Enhanced Raman Spectroscopy of Azidobenzene

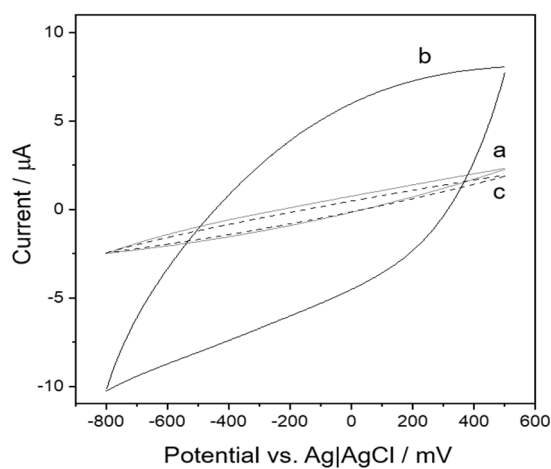

**Figure S3.** Cyclic voltammograms of the TiN electrode before (trace a) and after (trace b) reversible AB physisorption of azidobenzene. Trace c is obtained after washing of the electrode with water, indicating the reversibility of AB adsorption.

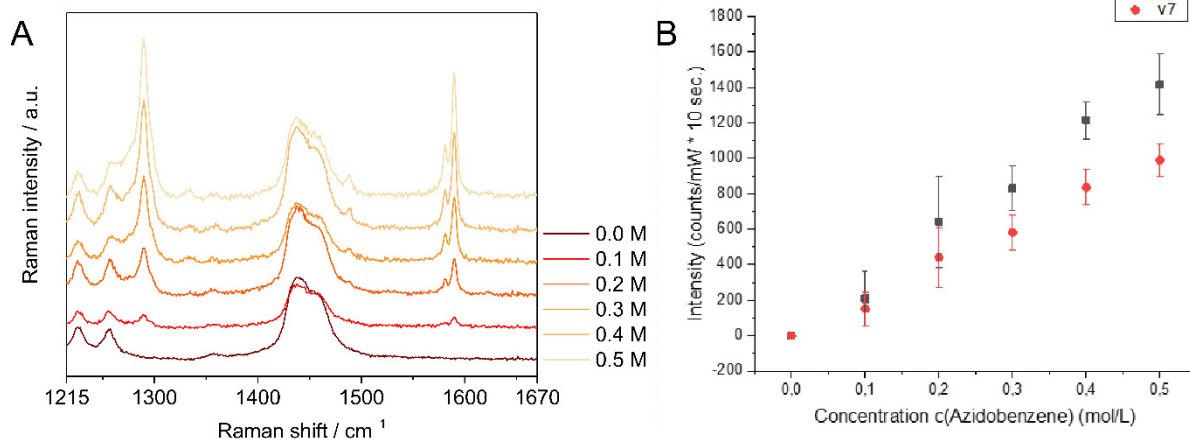

**Figure S4.** (A) 647 nm Raman spectra of azidobenzol in tert-butylmethylether. (B) Raman intensity of the  $\nu_7$  and  $\nu_{11}$  band of azidobenzene as a function of concentration.

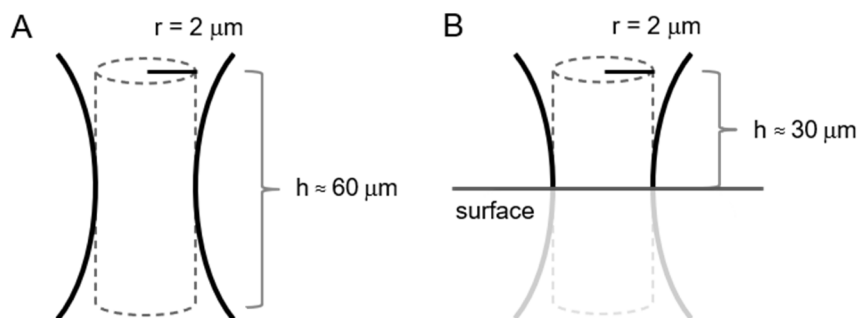

**Figure S5.** Approximated profile of the focussed laser beam for confocal Raman/SERS measurement in solution (A) and on the surface (B).

### 3. Electromagnetic Field Calculations Using RWCA

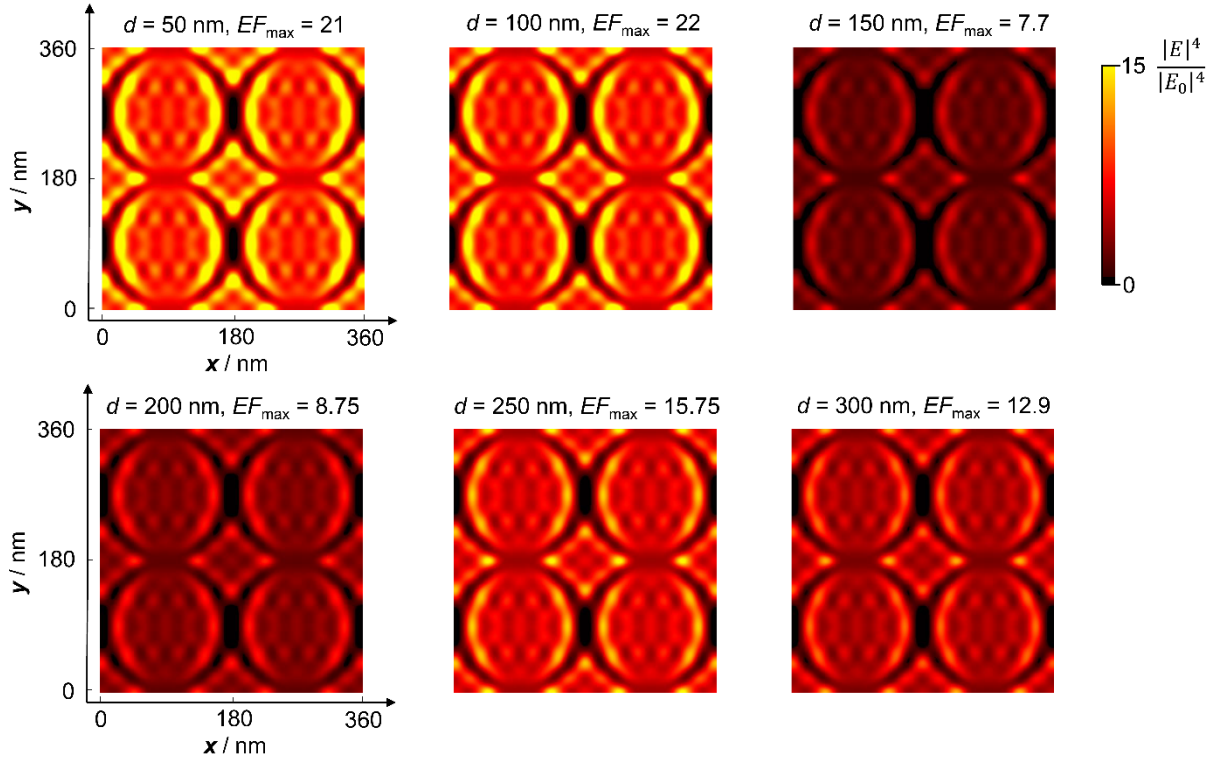

**Figure S6.** Top view over four unit cells showing the distribution of localized field hot spots upon illumination at 413 nm for six different nanotube lengths  $d$ . The scale shows the field enhancement (EF) value to fourth order  $|E|^4/|E_0|^4$ .

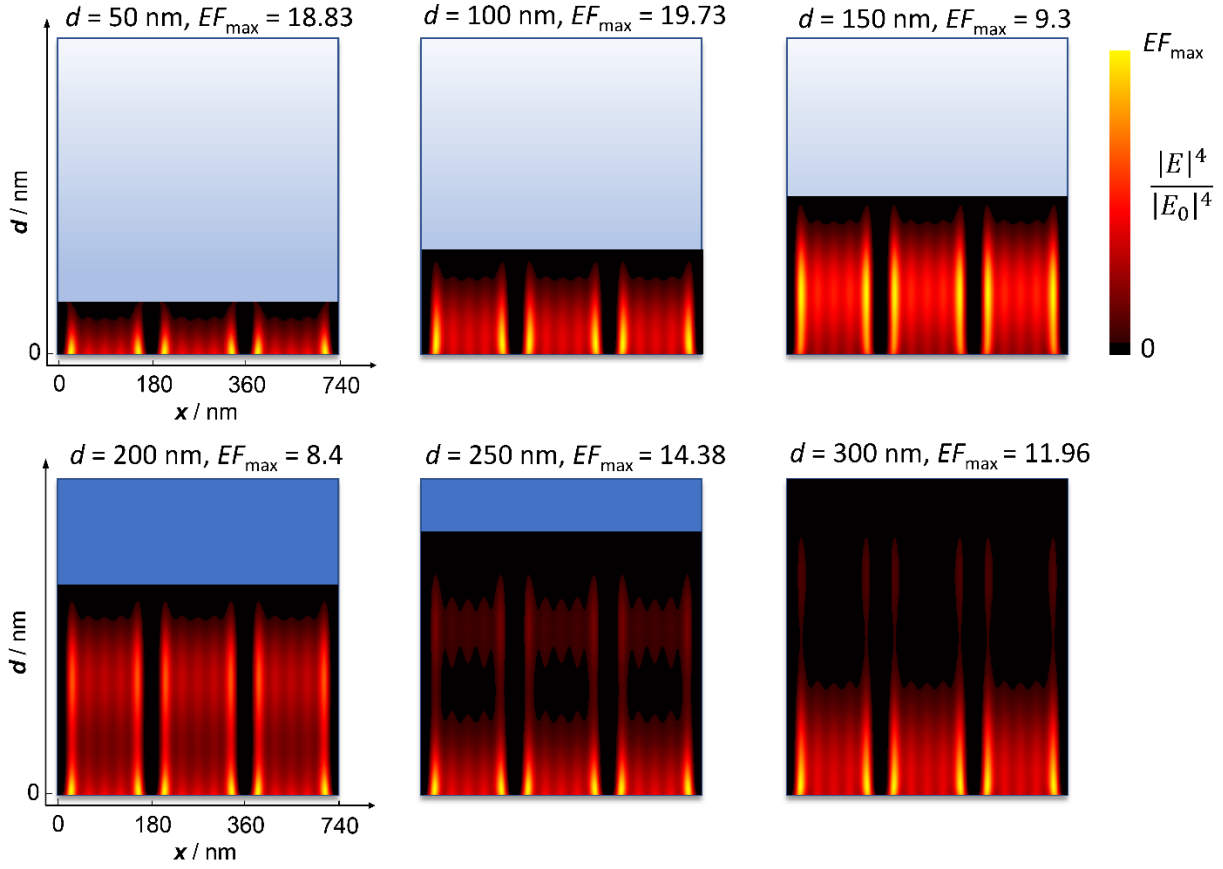

**Figure S7.** Side view of three unit cells combined at illumination with 413 nm. The scale shows the field enhancement factor (EF) value to fourth order  $|E|^4/|E_0|^4$ .

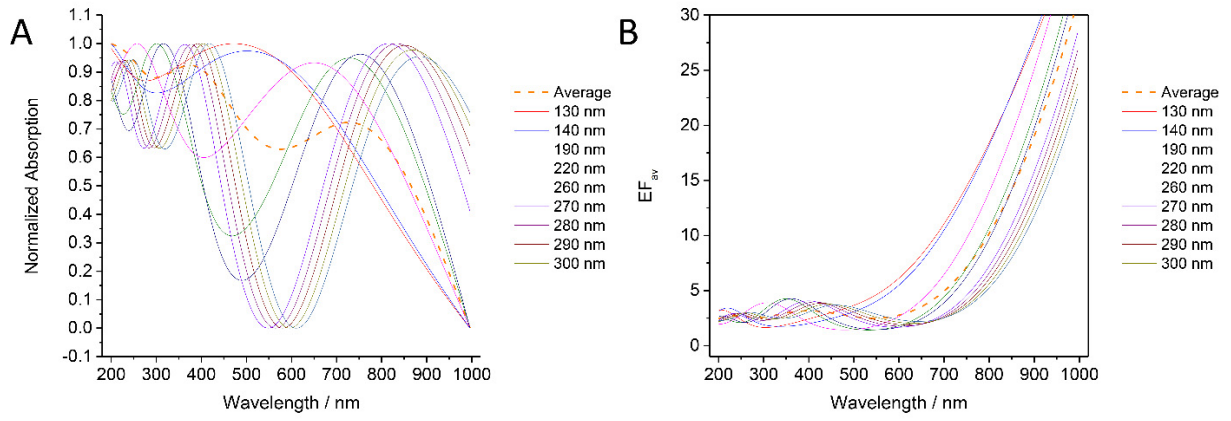

**Figure S8.** (A) Calculated relative absorbance  $A = 1 - R - T$  (A) and EME  $\frac{|E|^4}{|E_0|^4}$  values (B) at fixed tube lengths  $d$  ranging from 160 to 300 nm. The dashed orange lines represent the average over the different nanotube lengths.

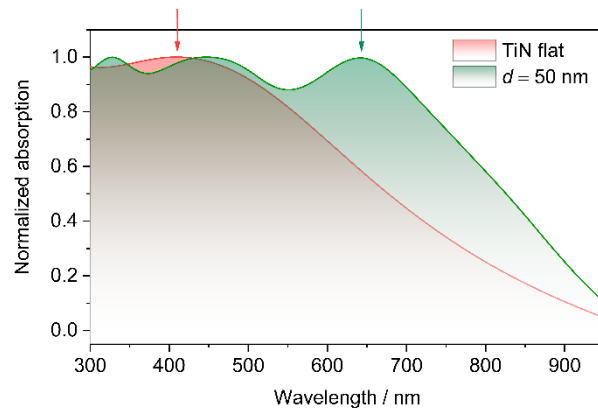

**Figure S9.** Spectral position of the plasmonic resonance of the flat TiN surface (red curve, surface plasmon polariton) compared to the nanostructured TiN electrode ( $d = 250$  nm) exhibiting, in addition, a plasmonic lattice resonance peak above 600 nm (green curve).
